# Supplementary material for: Overexpression of AmCBF1 enhances drought and cold stress tolerance, and improves photosynthesis in transgenic cotton
Source: PeerJ. 2022 May 25;10:e13422. doi: 10.7717/peerj.13422 (PMC9147321; doi:10.7717/peerj.13422)
Supplement: Supplemental Information 6 [file peerj-10-13422-s006.xls]

## Sheet: Fig.1D
	AG1-2	SSU	B-C	The average Ct value of the target gene minus the reference gene in the control sample	D-E	2△△ct	2-△△ct			L28	L30
L28	23.4392	12.9096	10.5296	10.6629	-0.13333	0.911724	1.09682			1.09682	1.7713			L28	L30
L28	23.5322	12.8972	10.6351	10.6629	-0.0278654	0.980871	1.0195			1.0195	1.8449		ave	1.00213	1.73481
L28	23.6033	12.9033	10.7001	10.6629	0.0371351	1.02607	0.974588			0.974588	1.68308		se	0.0378287	0.0457539
L28	23.6298	12.8428	10.787	10.6629	0.124061	1.0898	0.917601			0.917601	1.63997
L30	22.9649	13.1268	9.83811	10.6629	-0.824812	0.564556	1.7713		ave	1.00213	1.73481
L30	22.9438	13.1644	9.77938	10.6629	-0.88354	0.542036	1.8449		se	0.0378287	0.0457539
L30	23.0486	13.1367	9.91182	10.6629	-0.751104	0.594149	1.68308
L30	23.1288	13.1795	9.94925	10.6629	-0.713672	0.609766	1.63997
	23.4392	12.9096
	23.5322	12.8972
	23.6033	12.9033
	23.6298	12.8428
	23.5511	12.8882	10.6629

## Sheet: Fig.2B（1）
length（cm）
r15	Root	Shoot		30	Root	Shoot		28	Root	Shoot				Root	Shoot
	11.5	19.3			12.2	12.5			14.3	13.2			R15	11.9167	17.5
	11.3	19.6			8	12.5			14.1	13.8			L28	12.625	13.5083
	11.1	16.5			7.8	12.8			13.7	14.7			L30	10.575	12.4083
	13.1	19			13.9	14.2			10.8	11.1
	9.8	17.3			8.9	12.5			12.5	11.8
	13.3	18.4			13.5	13.3			13	12.6			se
	10.3	16			8	12			12.5	13.3			R15	0.355867	0.650175
	12.7	18			11.8	12.5			11.1	14.5			L28	0.363511	0.346729
	13.2	19.8			11.6	12.7			14.3	14.8			L30	0.663339	0.282698
	11	17.6			12.9	10.2			11.9	13.8
	12.5	17			9.3	11.3			11.3	14.9
	13.2	11.5			9	12.4			12	13.6
ave	11.9167	17.5			10.575	12.4083			12.625	13.5083
se	0.355867	0.650175			0.663339	0.282698			0.363511	0.346729
		Root	Shoot		multiple comparisons
r15	1	11.5	19.3		Variable		(I) Variety	(J) Variety	Mean difference (I-J)	Std. Error	significance	95% Confidence intervals
	1	11.3	19.6									Lower bound	Upper bound
	1	11.1	16.5		root	LSD	1	2	-0.708333	0.682545	0.306916	-2.09698	0.680314
	1	13.1	19					3	1.34167	0.682545	0.0577964	-0.0469806	2.73031
	1	9.8	17.3				2	1	0.708333	0.682545	0.306916	-0.680314	2.09698
	1	13.3	18.4					3	2.05000*	0.682545	0.00506179	0.661353	3.43865
	1	10.3	16				3	1	-1.34167	0.682545	0.0577964	-2.73031	0.0469806
	1	12.7	18					2	-2.05000*	0.682545	0.00506179	-3.43865	-0.661353
	1	13.2	19.8			Tamhane	1	2	-0.708333	0.508706	0.444012	-2.02264	0.605968
	1	11	17.6					3	1.34167	0.752768	0.253188	-0.652715	3.33605
	1	12.5	17				2	1	0.708333	0.508706	0.444012	-0.605968	2.02264
	1	13.2	11.5					3	2.05000*	0.756412	0.0438139	0.0486762	4.05132
28	2	14.3	13.2				3	1	-1.34167	0.752768	0.253188	-3.33605	0.652715
	2	14.1	13.8					2	-2.05000*	0.756412	0.0438139	-4.05132	-0.0486762
	2	13.7	14.7		shoot	LSD	1	2	3.99167*	0.644394	5.44991e-07	2.68064	5.3027
	2	10.8	11.1					3	5.09167*	0.644394	4.12689e-09	3.78064	6.4027
	2	12.5	11.8				2	1	-3.99167*	0.644394	5.44991e-07	-5.3027	-2.68064
	2	13	12.6					3	1.1	0.644394	0.097211	-0.21103	2.41103
	2	12.5	13.3				3	1	-5.09167*	0.644394	4.12689e-09	-6.4027	-3.78064
	2	11.1	14.5					2	-1.1	0.644394	0.097211	-2.41103	0.21103
	2	14.3	14.8			Tamhane	1	2	3.99167*	0.73685	0.000144772	2.03871	5.94462
	2	11.9	13.8					3	5.09167*	0.708975	9.44467e-06	3.18813	6.9952
	2	11.3	14.9				2	1	-3.99167*	0.73685	0.000144772	-5.94462	-2.03871
	2	12	13.6					3	1.1	0.447369	0.0663992	-0.059619	2.25962
30	3	12.2	12.5				3	1	-5.09167*	0.708975	9.44467e-06	-6.9952	-3.18813
	3	8	12.5					2	-1.1	0.447369	0.0663992	-2.25962	0.059619
	3	7.8	12.8		*.The mean difference is significant at the 0.05 level.
	3	13.9	14.2
	3	8.9	12.5
	3	13.5	13.3
	3	8	12
	3	11.8	12.5
	3	11.6	12.7
	3	12.9	10.2
	3	9.3	11.3
	3	9	12.4

## Sheet: Fig.2B(2)
dry biomass（g）
r15	root	shoot	root to shoot raito		L30	root	shoot	root to shoot raito		L28	root	shoot	root to shoot raito				root to shoot raito
	0.009	0.141	0.0638298			0.013	0.116	0.112069			0.013	0.124	0.104839			R15	0.0796311
	0.011	0.134	0.0820896			0.015	0.126	0.119048			0.02	0.165	0.121212			L28	0.119564
	0.019	0.263	0.0722433			0.017	0.148	0.114865			0.01	0.101	0.0990099			L30	0.10892
	0.014	0.198	0.0707071			0.018	0.174	0.103448			0.02	0.172	0.116279
	0.018	0.154	0.116883			0.022	0.218	0.100917			0.02	0.132	0.151515			se
	0.017	0.236	0.0720339			0.026	0.252	0.103175			0.033	0.265	0.124528			R15	0.00782171
ave	0.0146667	0.187667	0.0796311		ave	0.0185	0.172333	0.10892		ave	0.0193333	0.159833	0.119564			L28	0.00752403
se	0.00164655	0.0218398	0.00782171		se	0.00194508	0.0218688	0.00302664		se	0.00324208	0.0236325	0.00752403			L30	0.00302664
	root to shoot raito				multiple comparisons
1	0.0638298				Variable		(I) Variety	(J) Variety	Mean difference (I-J)	Std. Error	significance	95% Confidence intervals
1	0.0820896											Lower bound	Upper bound
1	0.0608365				root to shoot ratio	LSD	1.00	2.00	-.0494096*	0.00706774	4.34588e-06	-0.0644742	-0.0343451
1	0.0707071							3.00	-.0387661*	0.00706774	6.28034e-05	-0.0538306	-0.0237015
1	0.0714286						2.00	1.00	.0494096*	0.00706774	4.34588e-06	0.0343451	0.0644742
1	0.0720339							3.00	0.0106436	0.00706774	0.15285	-0.00442095	0.0257081
2	0.104839						3.00	1.00	.0387661*	0.00706774	6.28034e-05	0.0237015	0.0538306
2	0.121212							2.00	-0.0106436	0.00706774	0.15285	-0.0257081	0.00442095
2	0.0990099				*.The mean difference is significant at the 0.05 level.
2	0.116279
2	0.151515
2	0.124528
3	0.112069
3	0.119048
3	0.114865
3	0.103448
3	0.100917
3	0.103175

## Sheet: Fig.2D(1)
Control
	germination number of seed			number			number
R15	30		L28	30		L30	30				ave
	30			30			30					R15	L28	L30
	29			29			29				Control	98.3333	98.3333	99.1667
	29			29			30				300 mM Mannitol	78.3333	97.5	100
											15℃	2.5	41.6667	71.6667
R15	100		L28	100		L30	100
	100			100			100				se
	96.6667			96.6667			96.6667					R15	L28	L30
	96.6667			96.6667			100				Control	0.96225	0.96225	0.833333
ave	98.3333		ave	98.3333		ave	99.1667				300 mM Mannitol	3.96746	1.59571	0
se	0.96225		se	0.96225		se	0.833333				15℃	1.59571	2.15166	7.75791
M300
	germination number of seed			number			number
R15	21		L28	28		L30	30
	26			30			30
	22			30			30
	25			29			30
R15	70		L28	93.3333		L30	100
	86.6667			100			100
	73.3333			100			100
	83.3333			96.6667			100
ave	78.3333		ave	97.5		ave	100
se	3.96746		se	1.59571		se	0
15℃
	germination number of seed			number			number
R15	2		L28	12		L30	16
	1			11			27
	0			13			23
	0			14			20
R15	6.66667			40			53.3333
	3.33333			36.6667			90
	0			43.3333			76.6667
	0			46.6667			66.6667
ave	2.5		ave	41.6667		ave	71.6667
se	1.59571		se	2.15166		se	7.75791
			Control	M300	15℃						multiple comparisons
	R15-1	1	100	70	6.66667				(I) Variety	(J) Variety	Mean difference (I-J)	Std. Error	significance	95% Confidence intervals
	R15-2	1	100	86.6667	3.33333		Variable							Lower bound	Upper bound
	R15-3	1	96.6667	73.3333	0		Control	LSD	1	2	0	1.30289	1	-2.9473	2.9473
	R15-4	1	96.6667	83.3333	0					3	-0.83333	1.30289	0.538	-3.7807	2.114
	28-1	2	100	93.3333	40				2	1	0	1.30289	1	-2.9473	2.9473
	28-2	2	100	100	36.6667					3	-0.83333	1.30289	0.538	-3.7807	2.114
	28-3	2	96.6667	100	43.3333				3	1	0.83333	1.30289	0.538	-2.114	3.7807
	28-4	2	96.6667	96.6667	46.6667					2	0.83333	1.30289	0.538	-2.114	3.7807
	30-1	3	100	100	53.3333		M300	LSD	1	2	-19.16667*	3.49161	0	-27.0652	-11.2681
	30-2	3	100	100	90					3	-21.66667*	3.49161	0	-29.5652	-13.7681
	30-3	3	96.6667	100	76.6667				2	1	19.16667*	3.49161	0	11.2681	27.0652
	30-4	3	100	100	66.6667					3	-2.5	3.49161	0.492	-10.3986	5.3986
									3	1	21.66667*	3.49161	0	13.7681	29.5652
										2	2.5	3.49161	0.492	-5.3986	10.3986
							15℃	LSD	1	2	-39.16667*	6.7013	0	-54.3261	-24.0073
										3	-69.16667*	6.7013	0	-84.3261	-54.0073
									2	1	39.16667*	6.7013	0	24.0073	54.3261
										3	-30.00000*	6.7013	0.002	-45.1594	-14.8406
									3	1	69.16667*	6.7013	0	54.0073	84.3261
										2	30.00000*	6.7013	0.002	14.8406	45.1594
							*.The mean difference is significant at the 0.05 level.

## Sheet: Fig.2D(2)
Control						L28						L30						Control						ave	se		ave
Root length/cm	1	2	3	4			1	2	3	4			1	2	3	4			R15	4.57	4.22	4.12	4.42	4.3325	0.100778			R15	L28	L30
R15	5.3	3.1	4.5	5.1			2.7	4.2	6.5	5			6.6	4.2	3.4	4.5			L28	3.59	3.56	4.39	3.21	3.6875	0.249545		Control	4.3325	3.6875	3.8175
	2.7	3.5	4.2	6.2			5.6	5.3	5.5	2.1			6.6	4.5	2	4.4			L30	4.73	3.96	3.09	3.49	3.8175	0.352311		300mM Mannitol	2.07579	2.5971	2.67583
	4.5	3.3	4.2	3.1			3	3.2	4.6	3.7			4.8	3.5	2.7	3.5											15℃	0.204167	0.42422	0.48842
	4	5.6	5	4.6			4.7	3.7	3.4	3.5			6.4	7	4.2	2.2
	4.5	4.5	7.2	4.4			3.1	3	4.3	3.4			3.3	4.7	3.5	2.5
	2.5	5.5	3.3	3.6			3.8	2.7	5.2	4.2			2.4	5	1.5	3
	5	2.5	3.2	6.4			2.5	2.9	4	2.9			4.5	2.7	3	3.5
	6.5	5.8	3.2	4.4			2.6	4.8	3.7	1.8			5	4	2.5	4.2											se
	6.5	4.9	4.2	2.5			4.2	3.5	3.8	2			5	2.5	4.4	2.8												R15	L28	L30
	4.2	3.5	2.2	3.9			3.7	2.3	2.9	3.5			2.7	1.5	3.7	4.3												0.100778	0.249545	0.352311
ave	4.57	4.22	4.12	4.42			3.59	3.56	4.39	3.21			4.73	3.96	3.09	3.49												0.0770547	0.214161	0.14057
																												0.0266797	0.0155339	0.0341769
M300
R15	1	2	3	4		L28	1	2	3	4		L30	1	2	3	4		M300						ave	se
	3.5	2	1.5	2			2.6	3.5	3.5	3			2.7	2.7	5.9	5			R15	2.27143	1.97037	1.93636	2.125	2.07579	0.0770547
	2.4	1.7	2.3	2			2.5	3.7	3.4	2.5			5.5	2.2	7.6	5.5			L28	2.46667	3.22333	2.25357	2.44483	2.5971	0.214161
	2.7	2.5	2.5	2			3.3	5.1	1.7	2.8			2.6	1.4	3.6	4.4			L30	2.63	2.29667	2.86667	2.91	2.67583	0.14057
	2	1.7	1.8	2.4			2.8	3.5	1.7	3.4			3.4	4.8	5.7	2.9
	2.3	1.5	2.2	2.3			3	5.3	1.3	3.2			2.8	4.3	4.5	2.7
	2.7	2	2	1.7			2.6	5.3	2.3	4.2			2.1	3.3	4.1	2.8
	2.4	1.8	1.3	2.5			2.5	5.1	3	2.2			4.6	3.5	1.9	6.8
	3	2.6	2.4	2.2			1.5	2.3	2.1	2.5			7.4	3.5	2.1	5.3
	2.7	2.2	1.3	1.8			2.7	4.8	4.7	3.6			2.4	1.7	1.6	4.9
	2.5	2.1	2.9	2.2			3.5	2.9	2.5	2.3			3.7	2.2	3.2	4.2
	1.8	2.2	1.5	1.7			2.5	2.8	1.5	2.8			2.2	1.8	2.9	3.1
	3.1	1.8	2.1	2.9			2	3.8	2.3	1.7			1	2.6	1.6	2.7
	1.5	2.5	1.7	3.1			2	2.8	2.6	1.9			4	2	2.2	2.6
	3.4	2.7	2.8	2.7			3.9	3.5	2.5	1.5			1.8	2.4	3.3	2.4
	1.5	2.5	2.5	2.6			3.1	2.8	2	2.7			1.9	2.1	2.8	1.7
	2.6	2.1	2.2	2.3			3.5	2.5	2.5	2.9			1.7	1.9	2.6	3.5
	2.5	2.6	1.6	2.2			1.7	2.4	2.4	3			1.4	1.9	2.2	3.2
	1.9	1.5	1.9	2.4			1.6	2	2.5	2.8			2.5	1.7	2.2	1.8
	1.4	2.7	1.3	2.4			1.9	4.2	2.3	2.8			2.6	4.4	1.5	2.5
	1	1.5	1.4	1.6			2.2	2.1	3.4	2			1.7	2.3	2.7	2.5
	0.8	1.4	1.2	1.5			2.2	1.2	1.4	3			1.2	1	2	1
	2.27143	2.4	2.2	2			1.2	1.1	1.7	1.7			2.9	1.3	1.9	2
		0.8	1.93636	1.5			3.3	3.1	1.5	1.5			1.8	1.7	1.5	2
		1.7		1			2	3.3	1.8	2.8			1.8	2.1	3.1	1
		1.5		2.125			2.1	2.4	2.1	1.5			2.1	1.5	2	1.5
		1.8					2.6	3.7	1.7	1.2			1.6	1.6	1.7	2.5
		1.4					1.8	2.6	1.5	1.5			2.1	1.6	2.5	1.4
		1.97037					2.46667	3.4	1.2	1.7			2.5	1.7	3	1.7
								2.8	2.25357	2.2			2.4	1.2	1.6	1.6
								2.7		2.44483			2.5	2.5	2.5	2.1
								3.22333					2.63	2.29667	2.86667	2.91
15℃
R15	1	2	3	4		L28	1	2	3	4		L30	1	2	3	4		15℃						ave	se
	0.5	0.4	0.2	0.2			0.4	0.5	0.7	0.6			0.6	0.6	0.7	0.8			R15	0.25	0.25	0.15	0.166667	0.204167	0.0266797
	0.5	0.1	0.1	0.2			0.5	0.5	0.5	1			0.4	0.8	0.6	0.7			L28	0.4125	0.385714	0.452	0.446667	0.42422	0.0155339
	0.1	0.25	0.15	0.1			0.5	0.4	0.5	0.8			0.5	0.6	0.8	0.8			L30	0.4	0.541379	0.543333	0.468966	0.48842	0.0341769
	0.1			0.166667			0.7	0.3	0.6	0.6			0.5	0.7	0.8	0.6
	0.2						0.7	0.5	0.6	0.6			0.6	0.5	0.7	0.7
	0.1						0.7	0.5	0.6	0.4			0.7	0.5	0.6	0.5
	0.25						0.5	0.5	0.6	0.5			0.5	0.7	0.6	0.5
							0.6	0.6	0.4	0.6			0.5	0.6	0.5	0.5
							0.4	0.6	0.7	0.7			0.4	0.4	0.6	0.5
							0.6	0.4	0.6	0.4			0.3	0.5	0.5	0.6
							0.5	0.5	0.5	0.7			0.3	0.7	0.6	0.7
							0.5	0.4	0.4	0.5			0.5	0.7	0.7	0.5
							0.4	0.5	0.5	0.5			0.6	0.6	0.6	0.4
							0.3	0.3	0.3	0.4			0.4	0.6	0.5	0.4
							0.3	0.3	0.4	0.4			0.3	0.6	0.5	0.5
							0.3	0.4	0.2	0.5			0.4	0.7	0.4	0.5
							0.2	0.5	0.3	0.5			0.2	0.5	0.3	0.5
							0.4	0.4	0.1	0.5			0.5	0.3	0.5	0.5
							0.2	0.4	0.5	0.3			0.7	0.5	0.5	0.4
							0.3	0.3	0.5	0.1			0.2	0.5	0.3	0.4
							0.3	0.3	0.6	0.3			0.2	0.5	0.5	0.3
							0.2	0.2	0.5	0.4			0.1	0.5	0.6	0.3
							0.1	0.3	0.2	0.3			0.1	0.8	0.5	0.4
							0.3	0.4	0.4	0.3			0.1	0.3	0.4	0.3
							0.4125	0.1	0.1	0.3			0.4	0.2	0.4	0.3
								0.2	0.452	0.1				0.2	0.1	0.2
								0.2		0.2				0.4	0.5	0.2
								0.3		0.3				0.6	0.7	0.2
								0.385714		0.3				0.6	0.6	0.4
										0.3				0.541379	0.7	0.468966
										0.446667					0.543333
										multiple comparisons
				Control	M300	15℃				Variable		(I) Variety	(J) Variety	Mean difference (I-J)	Std. Error	significance	95% Confidence intervals
			1	4.57	2.27143	0.25											Lower bound	Upper bound
			1	4.22	1.97037	0.25				Control	LSD	1.00	2.00	0.645	0.361987	0.108462	-0.173872	1.46387
			1	4.12	1.93636	0.15							3.00	0.515	0.361987	0.188545	-0.303872	1.33387
			1	4.42	2.125	0.166667						2.00	1.00	-0.645	0.361987	0.108462	-1.46387	0.173872
			2	3.59	2.46667	0.4125							3.00	-0.13	0.361987	0.72778	-0.948872	0.688872
			2	3.56	3.22333	0.385714						3.00	1.00	-0.515	0.361987	0.188545	-1.33387	0.303872
			2	4.39	2.25357	0.452							2.00	0.13	0.361987	0.72778	-0.688872	0.948872
			2	3.21	2.44483	0.446667				300mM Mannitol	LSD	1.00	2.00	-.52131*	0.218422	0.0407771	-1.01541	-0.0272039
			3	4.73	2.63	0.4							3.00	-.60004*	0.218422	0.0225811	-1.09415	-0.105937
			3	3.96	2.29667	0.541379						2.00	1.00	.52131*	0.218422	0.0407771	0.0272039	1.01541
			3	3.09	2.86667	0.543333							3.00	-0.0787336	0.218422	0.726814	-0.572839	0.415372
			3	3.49	2.91	0.468966						3.00	1.00	.60004*	0.218422	0.0225811	0.105937	1.09415
													2.00	0.0787336	0.218422	0.726814	-0.415372	0.572839
										15℃	LSD	1.00	2.00	-.22005*	0.0376047	0.000243225	-0.305121	-0.134986
													3.00	-.28425*	0.0376047	3.47181e-05	-0.369321	-0.199185
												2.00	1.00	.22005*	0.0376047	0.000243225	0.134986	0.305121
													3.00	-0.0641993	0.0376047	0.121963	-0.149267	0.0208684
												3.00	1.00	.28425*	0.0376047	3.47181e-05	0.199185	0.369321
													2.00	0.0641993	0.0376047	0.121963	-0.0208684	0.149267
										*.The mean difference is significant at the 0.05 level.

## Sheet: relative water content
	Control			300 mM Mannitol			4℃
	R15	L28	L30	R15	L28	L30	R15	L28	L30			Control	300 mM Mannitol	4℃
	0.785714	0.839286	0.894737								R15	81.2184	72.5465	65.5229
	0.811321	0.92	0.897436	0.805556	0.798165	0.850877					L28	87.4135	80.2263	70.6336
	0.764706	0.893617	0.893617	0.741573	0.777778	0.820513					L30	88.3841	84.0807	71.3357
	0.875	0.875	0.888889	0.682692	0.8375	0.847619	0.632576	0.72434	0.733333
	0.818182	0.868421	0.84375	0.681818	0.797872	0.868132	0.670498	0.707424	0.700855		se
	0.818182	0.848485	0.884615	0.715686	0.8	0.817308	0.662614	0.687243	0.705882		R15	1.52462	2.29174	1.15532
ave	0.812184	0.874135	0.883841	0.725465	0.802263	0.84089	0.655229	0.706336	0.713357		L28	1.20954	0.970145	1.07229
se	0.0152462	0.0120954	0.008231	0.0229174	0.00970145	0.00963976	0.0115532	0.0107229	0.0100932		L30	0.8231	0.744462	1.00932
	81.2184	87.4135	88.3841	72.5465	80.2263	84.089	65.5229	70.6336	71.3357
	1.52462	1.20954	0.8231	2.29174	0.970145	0.963976	1.15532	1.07229	1.00932
		Control	M300	4℃		multiple comparisons
	1	0.785714	0.805556	0.632576		Variable		(I) Variety	(J) Variety	Mean difference (I-J)	Std. Error	significance	95% Confidence intervals
	1	0.811321	0.741573	0.670498									Lower bound	Upper bound
	1	0.764706	0.682692	0.662614		Control	LSD	1.00	2.00	-.06195*	0.0172529	0.00267598	-0.0987243	-0.025177
	1	0.875	0.681818						3.00	-.07166*	0.0172529	0.00084941	-0.10843	-0.0348829
	1	0.818182	0.715686					2.00	1.00	.06195*	0.0172529	0.00267598	0.025177	0.0987243
	1	0.818182							3.00	-0.0097059	0.0172529	0.582041	-0.0464795	0.0270677
	2	0.839286	0.798165	0.72434				3.00	1.00	.07166*	0.0172529	0.00084941	0.0348829	0.10843
	2	0.92	0.777778	0.707424					2.00	0.0097059	0.0172529	0.582041	-0.0270677	0.0464795
	2	0.893617	0.8375	0.687243		300 mM Mannitol	LSD	1.00	2.00	-.07680*	0.0217907	0.00418974	-0.124276	-0.0293202
	2	0.875	0.797872						3.00	-.11542*	0.0217907	0.000189274	-0.162902	-0.0679469
	2	0.868421	0.8					2.00	1.00	.07680*	0.0217907	0.00418974	0.0293202	0.124276
	2	0.848485							3.00	-0.0386267	0.0217907	0.101653	-0.0861045	0.00885112
	3	0.894737	0.850877	0.733333				3.00	1.00	.11542*	0.0217907	0.000189274	0.0679469	0.162902
	3	0.897436	0.820513	0.700855					2.00	0.0386267	0.0217907	0.101653	-0.00885112	0.0861045
	3	0.893617	0.847619	0.705882		4℃	LSD	1.00	2.00	-.05111*	0.0152824	0.0155321	-0.0885009	-0.0137115
	3	0.888889	0.868132						3.00	-.05813*	0.0152824	0.00893056	-0.0955222	-0.0207328
	3	0.84375	0.817308					2.00	1.00	.05111*	0.0152824	0.0155321	0.0137115	0.0885009
	3	0.884615							3.00	-0.00702128	0.0152824	0.662097	-0.044416	0.0303734
								3.00	1.00	.05813*	0.0152824	0.00893056	0.0207328	0.0955222
									2.00	0.00702128	0.0152824	0.662097	-0.0303734	0.044416
						*.The mean difference is significant at the 0.05 level.

## Sheet: Electrolytic leakage
							ave	se			Ccontrol	300mM Mannitol	4℃
Ccontrol	R15	22.803	25.5814	26.0835	25.0887	23.8213	24.6756	0.600393		R15	24.6756	39.4823	56.153
	L28	26.3246	25.2141	25.8979	24.0496	22.475	24.7922	0.695341		L28	24.7922	29.71	27.6574
	L30	26.725	25.6809	25.2525	27.1154	26.1411	26.183	0.337838		L30	26.183	28.7212	28.7777
M300	R15			40.0447	38.6044	39.7979	39.4823	0.444718
	L28			27.4906	33.2351	28.4044	29.71	1.78215
	L30			24.5628	30.6787	30.9221	28.7212	2.08038		se	0.600393	0.444718	6.87896
4℃	R15			53.6043	45.7188	69.1358	56.153	6.87896			0.695341	1.78215	3.91189
	L28			26.3256	21.6466	35	27.6574	3.91189			0.337838	2.08038	2.0266
	L30			25.2814	28.75	32.3016	28.7777	2.0266
	Ccontrol	300mM Mannitol	4℃		multiple comparisons
1	22.803	40.0447	53.6043		Variable		(I) Variety	(J) Variety	Mean difference (I-J)	Std. Error	significance	95% Confidence intervals
1	25.5814	38.6044	45.7188									Lower bound	Upper bound
1	26.0835	39.7979	69.1358		Ccontrol	LSD	1.00	2.00	-0.116665	0.79921	0.886365	-1.85799	1.62466
1	25.0887							3.00	-1.5074	0.79921	0.0837094	-3.24873	0.233927
1	23.8213						2.00	1.00	0.116665	0.79921	0.886365	-1.62466	1.85799
2	26.3246	27.4906	26.3256					3.00	-1.39074	0.79921	0.107391	-3.13207	0.350592
2	25.2141	33.2351	21.6466				3.00	1.00	1.5074	0.79921	0.0837094	-0.233927	3.24873
2	25.8979	28.4044	35					2.00	1.39074	0.79921	0.107391	-0.350592	3.13207
2	24.0496				300mM Mannitol	LSD	1.00	2.00	9.77229*	2.26595	0.0050228	4.2277	15.3169
2	22.475							3.00	10.76114*	2.26595	0.0031618	5.21655	16.3057
3	26.725	24.5628	25.2814				2.00	1.00	-9.77229*	2.26595	0.0050228	-15.3169	-4.2277
3	25.6809	30.6787	28.75					3.00	0.98885	2.26595	0.677816	-4.55574	6.53344
3	25.2525	30.9221	32.3016				3.00	1.00	-10.76114*	2.26595	0.0031618	-16.3057	-5.21655
3	27.1154							2.00	-0.98885	2.26595	0.677816	-6.53344	4.55574
3	26.1411				4℃	LSD	1.00	2.00	28.49561*	6.66984	0.00524974	12.1751	44.8161
								3.00	27.37534*	6.66984	0.00632638	11.0548	43.6958
							2.00	1.00	-28.49561*	6.66984	0.00524974	-44.8161	-12.1751
								3.00	-1.12027	6.66984	0.872133	-17.4408	15.2002
							3.00	1.00	-27.37534*	6.66984	0.00632638	-43.6958	-11.0548
								2.00	1.12027	6.66984	0.872133	-15.2002	17.4408
					*.The mean difference is significant at the 0.05 level.

## Sheet: Chlorophyll content
					ave	se			Control	300 mM Mannitol	4℃
Control	R15	1.3333	1.08626	1.21575	1.21177	0.0713398		R15	1.21177	0.942099	0.833612		0.222541	0.31207
	L28	1.68498	1.68304	1.6547	1.67424	0.00978699		L28	1.67424	1.30817	1.2175		0.218649	0.272805
	L30	1.97388	2.01428	1.92541	1.97119	0.0256873		L30	1.97119	1.60254	1.57335		0.18702	0.201828
M300	R15	0.957076	1.03981	0.829411	0.942099	0.0611973
	L28	1.22307	1.35665	1.34478	1.30817	0.0426855
	L30	1.46895	1.75171	1.58695	1.60254	0.0819959		se
4℃	R15	0.61089	1.00953	0.880419	0.833612	0.117432		R15	0.0713398	0.0611973	0.117432
	L28	1.14047	1.1118	1.40022	1.2175	0.0917348		L28	0.00978699	0.0426855	0.0917348
	L30	1.62812	1.44226	1.64966	1.57335	0.0658365		L30	0.0256873	0.0819959	0.0658365
			CK	M300	4℃		multiple comparisons
	R15-1	1	1.3333	0.957076	0.61089		Variable		(I) Variety	(J) Variety	Mean difference (I-J)	Std. Error	significance	95% Confidence intervals
	R15-2	1	1.08626	1.03981	1.00953									Lower bound	Upper bound
	R15-3	1	1.21575	0.829411	0.880419		Control	LSD	1.00	2.00	-.46247*	0.0624233	0.000310782	-0.615215	-0.309726
	L28-1	2	1.68498	1.22307	1.14047					3.00	-.75942*	0.0624233	1.87568e-05	-0.912166	-0.606677
	L28-2	2	1.68304	1.35665	1.1118				2.00	1.00	.46247*	0.0624233	0.000310782	0.309726	0.615215
	L28-3	2	1.6547	1.34478	1.40022					3.00	-.29695*	0.0624233	0.00313587	-0.449695	-0.144207
	L30-1	3	1.97388	1.46895	1.62812				3.00	1.00	.75942*	0.0624233	1.87568e-05	0.606677	0.912166
	L30-2	3	2.01428	1.75171	1.44226					2.00	.29695*	0.0624233	0.00313587	0.144207	0.449695
	L30-3	3	1.92541	1.58695	1.64966		300 mM Mannitol	LSD	1.00	2.00	-.36607*	0.0905188	0.00677116	-0.587559	-0.144576
										3.00	-.66044*	0.0905188	0.000337931	-0.88193	-0.438947
									2.00	1.00	.36607*	0.0905188	0.00677116	0.144576	0.587559
										3.00	-.29437*	0.0905188	0.0174218	-0.515862	-0.0728788
									3.00	1.00	.66044*	0.0905188	0.000337931	0.438947	0.88193
										2.00	.29437*	0.0905188	0.0174218	0.0728788	0.515862
							4℃	LSD	1.00	2.00	-.38389*	0.133016	0.0278387	-0.709364	-0.0584057
										3.00	-.73974*	0.133016	0.00143113	-1.06522	-0.414257
									2.00	1.00	.38389*	0.133016	0.0278387	0.0584057	0.709364
										3.00	-.35585*	0.133016	0.0367687	-0.68133	-0.0303716
									3.00	1.00	.73974*	0.133016	0.00143113	0.414257	1.06522
										2.00	.35585*	0.133016	0.0367687	0.0303716	0.68133
							*.The mean difference is significant at the 0.05 level.

## Sheet: soluble sugars content
							ave	se			Control	300mM Mannitol	4℃
Control	R15	4.75213	5.30649	5.6552	6.27215	4.82366	5.36193	0.280997		R15	5.36193	7.34959	9.72055
	L28	7.14841	10.2153	13.0497	11.6995	9.88445	10.3995	0.989505		L28	10.3995	11.7912	20.4557		1.9395	1.60433	2.10438
	L30	12.0214	11.7174	12.6652	11.4402	11.6995	11.9088	0.210332		L30	11.9088	17.4175	16.8121		2.22099	2.36987	1.72955
M300	R15		7.33617	7.43453	7.88159	6.74605	7.34959	0.233575
	L28		10.8769	13.7024	11.78	10.8054	11.7912	0.674566		se
	L30		17.8959	18.8526	14.9542	17.9674	17.4175	0.849446		R15	0.280997	0.233575	1.02355
4℃	R15			8.0217	11.5591	9.58084	9.72055	1.02355		L28	0.989505	0.674566	1.92825
	L28			23.8814	17.2089	20.2769	20.4557	1.92825		L30	0.210332	0.849446	2.14804
	L30			20.7128	13.3027	16.421	16.8121	2.14804
	Control	300mM Mannitol	4℃		multiple comparisons
1	4.75213	7.33617	8.0217		Variable		(I) Variety	(J) Variety	Mean difference (I-J)	Std. Error	significance	95% Confidence intervals
1	5.30649	7.43453	11.5591									Lower bound	Upper bound
1	5.6552	7.88159	9.58084		Control	LSD	1.00	2.00	-5.03755*	0.857251	7.52308e-05	-6.90534	-3.16976
1	6.27215	6.74605						3.00	-6.54684*	0.857251	6.02853e-06	-8.41463	-4.67905
1	4.82366						2.00	1.00	5.03755*	0.857251	7.52308e-05	3.16976	6.90534
2	7.14841	10.8769	23.8814					3.00	-1.5093	0.857251	0.10374	-3.37709	0.358493
2	10.2153	13.7024	17.2089				3.00	1.00	6.54684*	0.857251	6.02853e-06	4.67905	8.41463
2	13.0497	11.78	20.2769					2.00	1.5093	0.857251	0.10374	-0.358493	3.37709
2	11.6995	10.8054			300mM Mannitol	LSD	1.00	2.00	-4.44161*	0.905964	0.000844576	-6.49104	-2.39217
2	9.88445							3.00	-10.06794*	0.905964	1.47695e-06	-12.1174	-8.01851
3	12.0214	17.8959	20.7128				2.00	1.00	4.44161*	0.905964	0.000844576	2.39217	6.49104
3	11.7174	18.8526	13.3027					3.00	-5.62633*	0.905964	0.000156909	-7.67577	-3.5769
3	12.6652	14.9542	16.421				3.00	1.00	10.06794*	0.905964	1.47695e-06	8.01851	12.1174
3	11.4402	17.9674						2.00	5.62633*	0.905964	0.000156909	3.5769	7.67577
3	11.6995				4℃	LSD	1.00	2.00	-10.73519*	2.50065	0.00513222	-16.8541	-4.61631
								3.00	-7.09160*	2.50065	0.0297266	-13.2105	-0.972718
							2.00	1.00	10.73519*	2.50065	0.00513222	4.61631	16.8541
								3.00	3.64359	2.50065	0.195363	-2.47528	9.76247
							3.00	1.00	7.09160*	2.50065	0.0297266	0.972718	13.2105
								2.00	-3.64359	2.50065	0.195363	-9.76247	2.47528
					*.The mean difference is significant at the 0.05 level.

## Sheet: area of epidermal cells
	R15	L28	L30				R15	L28	L30
	3043.66	1201.75	1504.62			ave	3263.13	1585.52	1817.82
	3668.06	1365.61	1504.66			se	107.983	116.722	103.046
	3308.48	1248.58	1563.24
	3425.25	1474.93	1649.47
	4003.46	1764.05	1580.76
	3713.07	1270.35	2200.99
	2773.6	1793.43	2128.88
	2873.33	2125.39	2122.07
	2945.89	2025.57	2105.7
	3196.83
	3092.01
	3113.94
ave	3263.13	1585.52	1817.82
se	107.983	116.722	103.046
	1	3043.66
	1	3668.06
	1	3308.48			multiple comparisons
	1	3425.25			Variable:	area
	1	4003.46			(I) Variety			Mean difference (I-J)	Std. Error	significance	95% Confidence intervals
	1	3713.07									Lower bound	Upper bound
	1	2773.6			LSD	1.00	2.00	1677.61269*	153.801	2.13242e-11	1362.04	1993.19
	1	2873.33					3.00	1445.31201*	153.801	5.29625e-10	1129.74	1760.89
	1	2945.89				2.00	1.00	-1677.61269*	153.801	2.13242e-11	-1993.19	-1362.04
	1	3196.83					3.00	-232.301	164.42	0.169126	-569.664	105.062
	1	3092.01				3.00	1.00	-1445.31201*	153.801	5.29625e-10	-1760.89	-1129.74
	1	3113.94					2.00	232.301	164.42	0.169126	-105.062	569.664
	2	1201.75			*.The mean difference is significant at the 0.05 level.
	2	1365.61
	2	1248.58
	2	1474.93
	2	1764.05
	2	1270.35
	2	1793.43
	2	2125.39
	2	2025.57
	3	1504.62
	3	1504.66
	3	1563.24
	3	1649.47
	3	1580.76
	3	2200.99
	3	2128.88
	3	2122.07
	3	2105.7

[truncated: 2 more sheets: stomatal density, Fig4C]
